# Supplementary material for: Discovery of a small protein-encoding cis-regulatory overlapping gene of the tumor suppressor gene Scribble in humans
Source: PubMed Central journal article supplement (PMC8448870; doi:10.1038/s42003-021-02619-8), 2021-09-17
Supplement: 42003_2021_2619_MOESM2_ESM.pdf [file 42003_2021_2619_MOESM2_ESM.pdf]

## Description of Additional Supplementary Files

**File name:** Supplementary Data 1

**Description:** Source data underlying graphs and charts in Figures 5a, 5b, and 6b.
